# Supplementary material for: Therapeutic potential of human minor salivary gland epithelial progenitor cells in liver regeneration
Source: PubMed Central journal article supplement (PMC5629247; doi:10.1038/s41598-017-11880-z), 2017-10-05
Supplement: 41598_2017_11880_MOESM1_ESM.pdf [file 41598_2017_11880_MOESM1_ESM.pdf]

Article Title: Therapeutic potential of human minor salivary gland epithelial progenitor cells in liver regeneration

Authors:

Chen Zhang<sup>1, #</sup> E-mail address: nightglow123@gmail.com

Yan Li<sup>2</sup> E-mail address: s2007148@126.com

Xiang-yu Zhang<sup>3</sup> E-mail address: nchot@163.com

Lei Liu<sup>4</sup> E-mail address: ssydll@126.com

Hai-zhou Tong<sup>4</sup> E-mail address: 838472562@qq.com

Ting-lu Han<sup>4</sup> E-mail address: 1634877010@qq.com

Wan-di Li<sup>4</sup> E-mail address: wandili@hotmail.com

Xiao-lei Jin<sup>1</sup> E-mail address: jinyuyizxyy@126.com

Ning-bei Yin<sup>4</sup> E-mail address: ningbeiyin@gmail.com

Tao Song<sup>4</sup> E-mail address: gxstst@126.com

Hai-dong Li<sup>4</sup> E-mail address: 93041992@qq.com

Juan Zhi<sup>5</sup> E-mail address: hnzhijuan@163.com

Zhen-min Zhao<sup>4, 6, \*</sup> E-mail address: zhaozhenmin0098@163.com

Lin Lu<sup>7, \*</sup> E-mail address: lulin\_12345@163.com

#First Author, \*Co-corresponding Author.

Correspondence and requests for materials should be addressed to Zhenmin Z (zhaozhenmin0098@163.com) and Lin L (lulin\_12345@163.com).

**Supplementary Table.1 Product ID of Antibodies**

---

| Immunofluorescence<br>Staining Antibody | Product ID         |
|-----------------------------------------|--------------------|
| ABCG2                                   | Abcam, ab24115     |
| PLET1                                   | Millipore, MAB4416 |
| CK15                                    | Abcam, ab93944     |
| CK18                                    | Abcam, ab7797      |
| CK19                                    | Abcam, ab52907     |
| hTERT                                   | Abcam, ab111584    |
| K5                                      | Sigma, SAB4501651  |
| K8                                      | Sigma, SAB4501653  |
| Laminin                                 | Abcam, ab49726     |
| LGR5                                    | Abcam, ab75732     |
| LGR6                                    | Abcam, ab126747    |
| CD31                                    | Abcam, ab76533     |
| ALB                                     | Abcam, ab137885    |
| CYP3A4                                  | Sigma, SAB5300118  |

---

| Flow Cytometry<br>Antibody | Product ID        |
|----------------------------|-------------------|
| CD29                       | Biolegend, 303015 |
| CD49f                      | Biolegend, 313607 |
| CK-KIT                     | BD, 550953        |
| CD44                       | Biolegend, 103017 |
| CD166                      | Biolegend, 343903 |
| STRO1                      | Biolegend, 340103 |
| SOX2                       | Biolegend, 656108 |
| ALB                        | Abcam, ab137885   |
| CD117                      | Biolegend, 313213 |

---

---

|       |                   |
|-------|-------------------|
| CD90  | Biolegend, 328115 |
| CD105 | Biolegend, 323209 |
| CD106 | Biolegend, 305805 |
| SSEA1 | Biolegend, 125609 |
| OCT4  | Biolegend, 653703 |
| NANOG | Biolegend, 674201 |

---

**Supplementary Table.1 Product ID of Antibodies.** The manufacture and product ID of antibodies we used in the immunofluorescence staining and flow cytometry analysis are shown in the table.

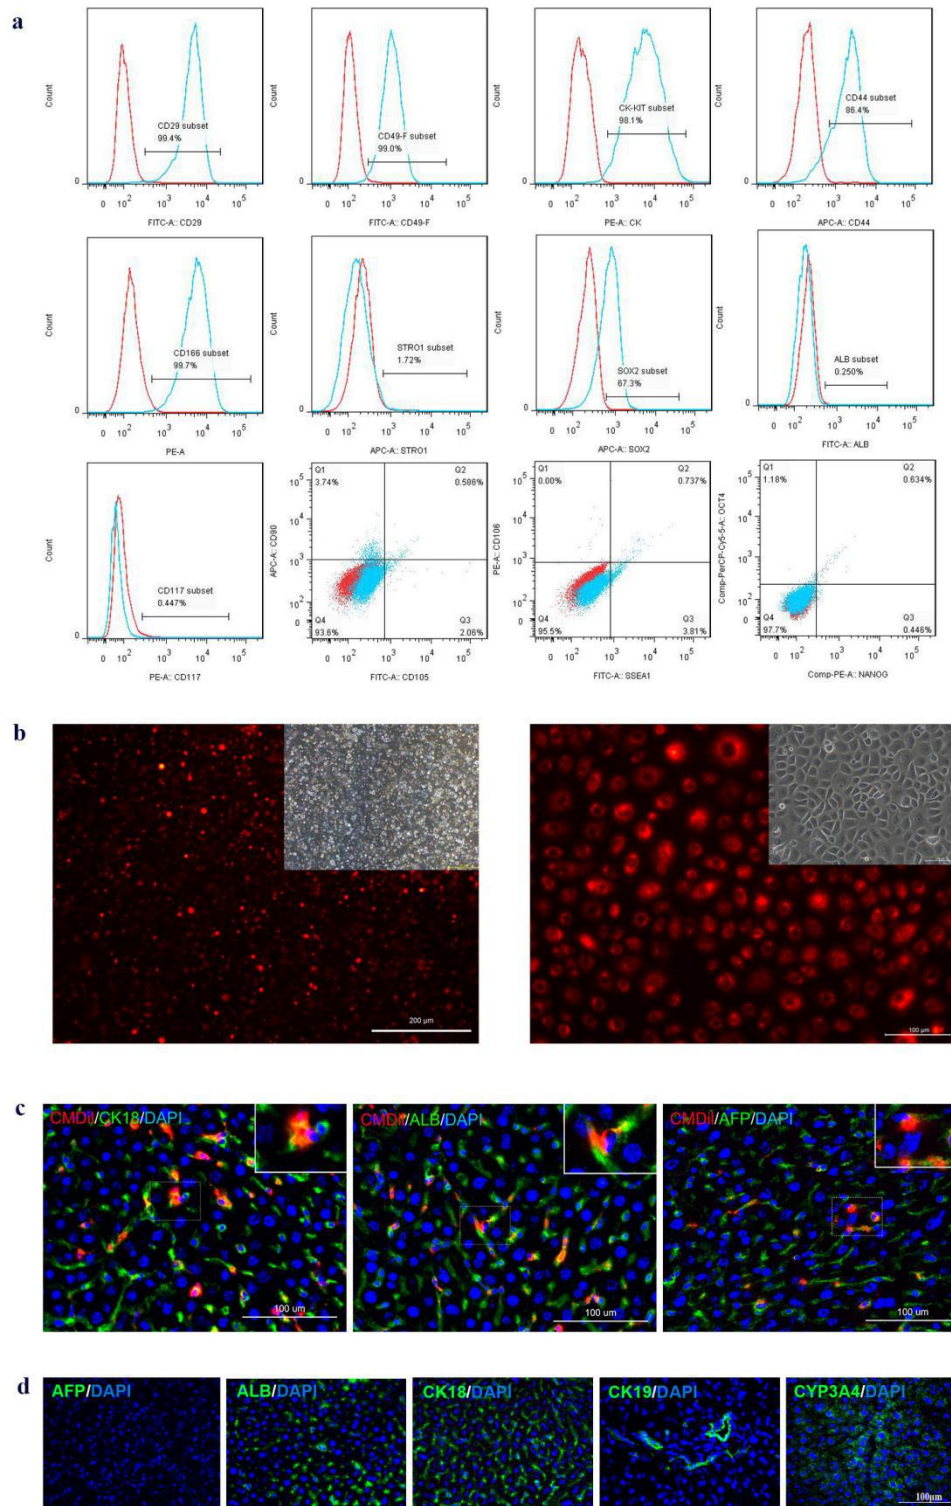

**Supplementary Figure.1** (a) Representative flow cytometry analysis plots of hMSG-EpiPCs at passage 5. (b) Fluorescence photos of hMSG-EpiPCs immediately after labeled by CM-Dil (left) and cultured 2 days after the labelling (right). (c) Immunostaining 2 weeks after hMSG-EpiPCs transplantation, green fluorescence signal for AFP, ALB and CK18 from left to right, and red for CM-Dil labeling. (d)

Immunostaining of normal SCID mice the liver tissues, green fluorescence signal for AFP, ALB, CK18, CK19 and CYP3A4 from left to right.
